# Supplementary material for: Contribution of Hydrolysis and Drying Conditions to Whey Protein Hydrolysate Characteristics and In Vitro Antioxidative Properties
Source: MDPI journal article supplement (doi:10.3390/antiox11020399), 2022-02-16
Supplement: s1 [file s1]

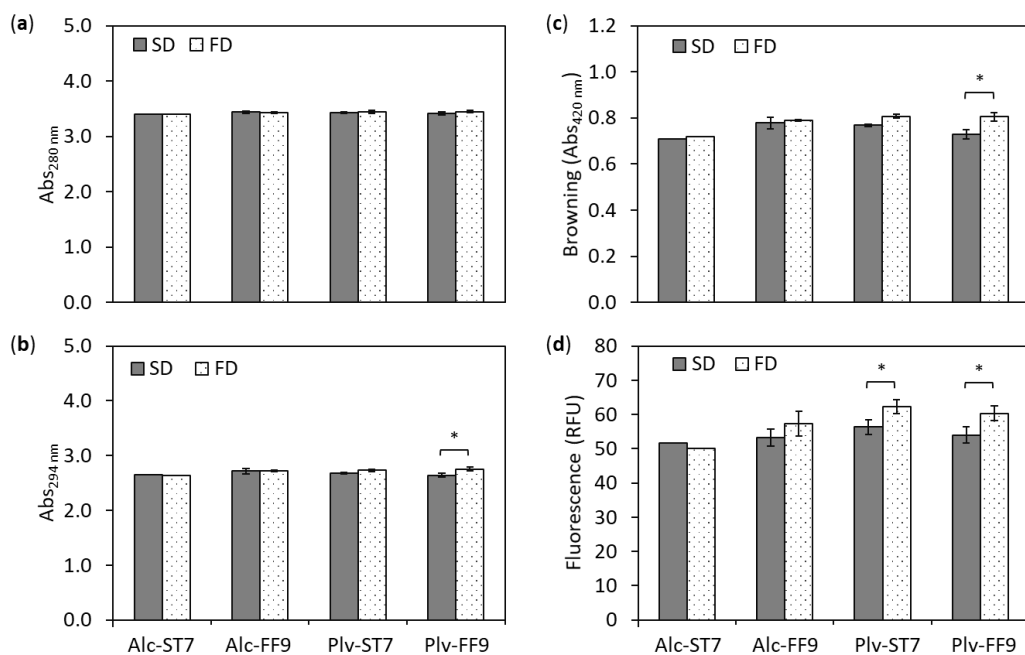

**Figure S1:** Effect of spray- (SD) and freeze-drying (FD) on non-fluorescence Maillard reaction intermediate products measured at (a) absorbance (Abs) 280 nm and (b) Abs 294 nm, (c) browning of late Maillard reaction products and (d) fluorescence of advanced Maillard reaction products expressed as relative fluorescence units (RFU) of whey protein hydrolysates prepared using Alcalase® (Alc) and Prolyve® (Plv) obtained under pH-stat at pH 7.0 (ST7) and free-fall pH 9.0 (FF9). Results represent mean  $\pm$  SD ( $n = 3$ ). \* denotes significant difference at  $p < 0.05$ .

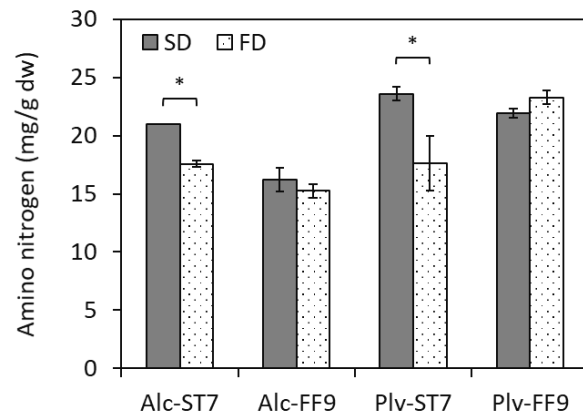

**Figure S2:** Effect of spray- (SD) and freeze-drying (FD) on amino nitrogen contents of whey protein hydrolysates prepared using Alcalase® (Alc) and Prolyve® (Plv) obtained under pH-stat at pH 7.0 (ST7) and free-fall pH 9.0 (FF9). Results represent mean  $\pm$  SD ( $n = 3$ ), where \* denotes significant difference at  $p < 0.05$ .

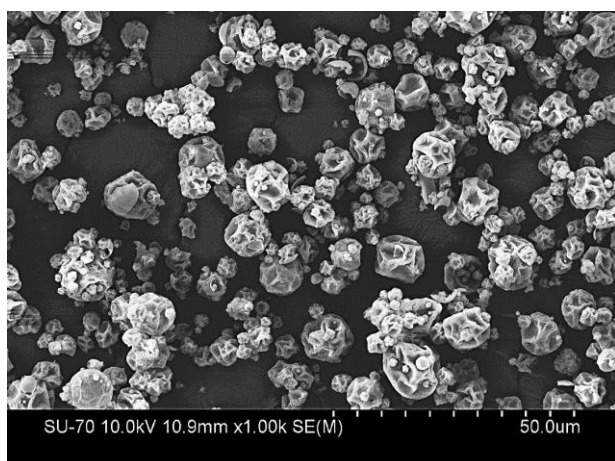

**Figure S3:** Scanning electron micrograph of whey protein concentrate (WPC80) powder used as a substrate for the generation of whey protein hydrolysates in the present study.
